# Supplementary material for: Comparative Genome Analysis of Filamentous Fungi Reveals Gene Family Expansions Associated with Fungal Pathogenesis
Source: PLoS One. 2008 Jun 4;3(6):e2300. doi: 10.1371/journal.pone.0002300 (PMC2409186; doi:10.1371/journal.pone.0002300)
Supplement: Table S4 — (0.06 MB XLS) [file pone.0002300.s004.xls]

## Sheet: S4
	Table S4: Fungal specific MCL clusters, those containing proteins from 33 species of fungi (excluding E. cuniculi) but not from the oomycetes (number of proteins from each species shown). Clusters highlighted in bold have members in E. cuniculi.
cluster ID	Annotation	Afumigatus	Anidulans	Aniger	Aoryzae	Aterreus	Bcinerea	Cglobosum	Cimmitis	Gzeae	Mgrisea	Ncrassa	Pchrysosporium	Pramorum	Psojae	Roryzae	Ssclerotiorum	Snodorum	Treesei	Umaydis	Calbicans	Cglabrata	Clusitaniae	Dhansenii	Ecuniculi	Egossypii	Klactis	Kwalti	Sbayanus	Scastellii	Scerevisiae	Skluyveri	Skudriavzevii	Smikatae	Sparadoxus	Spombe	Ylipolytica
MCL5	Similar to YN2F_SCHPO Putative transporter C530.15c (O74829) (1e-141)	37	42	81	72	51	44	18	12	31	14	14	25	0	0	2	33	39	24	17	18	7	10	16	0	2	2	6	12	5	6	4	5	14	8	20	12
MCL7	Similar to INA1_TRIHA Amino-acid permease inda1 (P34054) (0)	17	26	21	28	26	19	11	13	23	17	10	6	0	0	9	17	15	16	8	46	14	25	22	0	15	16	20	45	15	18	4	10	28	23	12	16
MCL10	Similar to TOXA_COCCA Putative HC-toxin efflux carrier TOXA (Q00357) (1e-101)	27	32	53	51	40	44	28	23	31	28	15	21	0	0	8	24	39	17	9	10	2	6	7	0	2	4	7	4	2	6	5	4	7	6	5	4
MCL25	Similar to AAP2_NEUCR Amino acid permease 2 (O59942) (0)	27	23	34	39	25	21	2	14	20	5	4	11	0	0	9	21	22	12	6	20	2	8	7	0	3	6	6	8	2	4	6	1	7	4	8	9
MCL44	Similar to DAL5_YEAST ALLANTOATE PERMEASE (P15365) (7e-85)	17	21	27	32	24	9	6	5	18	9	2	8	0	0	8	6	10	11	4	13	1	4	12	0	1	6	6	8	3	3	1	3	4	3	5	6
MCL72	Similar to SPN4_SCHPO Septin homolog spn4 (P48009) (1e-134)	4	4	4	4	4	4	4	4	4	4	4	5	0	0	24	4	4	4	3	14	8	6	6	3	8	7	5	14	7	7	4	6	13	7	7	8
MCL91	Similar to KDPG_SCHPO Probable serine/threonine-protein kinase C29A4.16 (O14019) (1e-148)	5	4	4	5	4	4	4	4	4	5	4	2	0	0	18	4	4	4	3	11	9	7	7	0	6	6	5	14	8	7	3	5	10	7	6	5
MCL98	Similar to MNT2_CANAL Probable mannosyltransferase MNT2 (P46592) (1e-133)	3	3	3	3	3	3	4	3	3	4	5	1	0	0	14	4	3	4	2	10	7	6	8	1	4	6	5	18	8	9	5	7	15	10	6	4
MCL125	Similar to SPM1_MAGGR Subtilisin-like proteinase Spm1 precursor (Serine protease of Magnaporthe 1) (P58371) (0)	3	2	2	2	2	2	5	14	13	6	4	1	0	0	11	2	7	5	1	5	4	3	3	2	2	2	3	6	3	3	1	2	6	4	2	15
MCL128	Similar to PMTY_SCHPO Probable dolichyl-phosphate-mannose--protein mannosyltransferase C16C6.09 (O42933) (0)	3	3	3	3	3	3	3	3	3	3	3	3	0	0	8	3	3	3	3	9	6	5	4	1	4	4	5	13	4	6	1	1	11	8	3	4
MCL148	Similar to VTC4_YEAST VTC4 protein (P47075) (0)	3	2	3	3	3	4	3	3	3	3	3	3	0	0	17	2	3	3	3	6	3	3	3	1	3	3	3	9	3	4	3	5	8	4	3	3
MCL158	Similar to HXK_KLULA Hexokinase (P33284) (1e-156)	6	4	4	4	3	3	2	3	4	3	3	2	0	0	11	3	5	3	2	11	3	3	2	0	2	2	2	9	4	4	2	4	5	4	2	3
MCL166	Similar to IDH1_AJECA Isocitrate dehydrogenase [NAD] subunit 1, mitochondrial precursor (Isocitric dehydrogenase) (NAD+-specific ICDH) (O13302) (0)	5	5	5	6	5	4	3	3	5	4	3	2	0	0	6	3	5	4	4	6	3	2	3	0	3	3	3	5	2	3	2	2	5	3	3	3
MCL192	Similar to DCPY_EMENI Pyruvate decarboxylase (P87208) (0)	3	2	4	6	4	1	1	2	2	1	2	1	0	0	3	1	4	2	1	6	4	3	4	0	4	3	2	11	5	5	4	3	8	5	4	2
MCL230	Similar to YM8G_YEAST Hypothetical 107.7 kDa protein in TSP3-IPP2 intergenic region (Q03516) (1e-153)	4	3	4	4	3	5	3	3	2	2	3	4	0	0	3	3	3	3	1	6	3	3	4	0	3	3	3	7	2	3	1	1	5	3	1	2
MCL233	Similar to EXG_BLUGR Glucan 1,3-beta-glucosidase precursor (Exo-1,3-beta-glucanase) (Q96V64) (1e-172)	3	3	2	3	3	4	1	1	3	1	1	7	0	0	4	4	5	2	7	6	3	2	3	0	2	1	2	7	3	3	1	3	4	3	2	1
MCL256	Similar to ALR1_YEAST Magnesium transporter ALR1 (Aluminum resistance protein 1) (Q08269) (1e-104)	3	4	4	4	4	2	2	2	2	2	2	2	0	0	5	2	2	2	2	4	2	3	2	0	2	2	2	13	1	3	1	2	4	3	2	2
MCL267	Similar to NUT1_MAGGR Nitrogen regulatory protein NUT1 (Q01168) (0)	2	2	2	2	2	2	2	2	2	2	2	2	0	0	17	2	2	2	1	6	3	4	3	1	2	2	2	3	3	2	1	1	3	2	1	3
MCL289	Similar to ARO8_YEAST AROMATIC AMINO ACID AMINOTRANSFERASE I (P53090) (1e-100)	2	6	4	3	2	2	2	2	2	4	2	5	0	0	2	2	2	2	2	4	2	2	3	0	2	3	3	4	2	2	2	1	4	2	3	2
MCL339	Similar to OSH1_YEAST Oxysterol-binding protein homolog 1 (P35845) (1e-177)	2	2	1	2	2	2	2	2	2	2	2	1	0	0	1	2	2	2	2	4	3	2	2	0	2	2	2	9	3	3	2	2	5	4	2	2
MCL348	Similar to YBZ7_YEAST HYPOTHETICAL 33.5 KD PROTEIN IN MRPS9-YSW1 INTERGENIC REGION (P38279) (2e-48)	3	2	3	2	2	2	2	3	2	2	2	2	0	0	4	2	2	2	2	5	2	4	4	0	1	1	1	4	2	2	1	2	4	2	1	3
MCL374	Similar to LAG1_YEAST Longevity-assurance protein 1 (Longevity assurance factor 1) (P38703) (2e-91)	2	2	2	2	2	2	3	2	3	2	2	2	0	0	2	3	2	4	2	3	2	2	2	1	2	2	2	3	2	2	2	1	3	3	2	2
MCL392	Similar to SKT5_YEAST SKT5 protein (P34226) (3e-75)	2	2	2	2	2	1	2	2	2	2	2	2	0	0	10	2	2	2	2	1	1	1	1	2	1	1	1	4	1	2	1	2	5	2	3	2
MCL423	Similar to YG2J_YEAST HYPOTHETICAL 38.3 KD PROTEIN IN RPL11B-PDC6 INTERGENIC REGION (P53252) (1e-106)	2	2	2	2	2	2	2	2	2	2	2	1	0	0	1	2	2	2	1	4	3	2	2	0	2	2	2	4	2	2	1	2	4	2	3	1
MCL458	Similar to EKC1_SCHPO Extragenic suppressor of kinetochore protein 1 (O74511) (6e-89)	1	1	1	1	1	1	1	1	1	1	1	1	0	0	2	1	1	1	1	4	2	2	2	0	2	2	3	8	3	4	1	1	7	4	1	1
MCL509	Similar to ER25_CANAL C-4 methyl sterol oxidase (O59933) (1e-109)	3	4	2	5	3	1	2	3	2	2	1	1	0	0	2	1	1	2	2	4	1	2	2	0	1	1	1	2	1	1	1	1	2	1	1	1
MCL532	Similar to FKH1_YEAST Fork head protein homolog 1 (P40466) (3e-45)	1	1	1	1	1	1	1	1	1	1	1	3	0	0	9	1	1	1	2	2	2	1	1	2	1	1	1	5	2	2	1	1	3	2	2	1
MCL545	Pfam motifs: Caspase domain (PF00656)	2	2	2	2	2	1	2	1	2	2	2	4	0	0	7	1	2	2	1	2	1	1	1	0	1	1	1	2	2	1	1	1	2	1	1	1
MCL554	Similar to K6P1_ASPOR 6-phosphofructokinase alpha subunit (Phosphofructokinase 1) (Phosphohexokinase) (6PF-1-K alpha subunit) (Q9HGZ1) (0)	1	1	1	2	2	2	1	1	1	1	1	1	0	0	2	1	1	1	1	4	3	2	2	1	2	2	2	4	2	2	1	1	4	2	1	1
MCL601	Similar to MRS2_NEUCR Inner membrane magnesium transporter MRS2, mitochondrial precursor (RNA splicing protein MRS2) (Q7SFQ9) (1e-138)	1	2	1	2	1	1	1	1	1	2	1	1	0	0	1	1	1	1	1	4	2	2	2	0	2	2	2	4	1	2	2	2	3	2	1	2
MCL624	Similar to YJX4_SCHPO Protein C23B6.04c in chromosome III (Q9UU99) (9e-88)	1	1	1	1	1	1	1	1	1	1	1	2	0	0	2	1	1	1	1	4	2	2	2	0	2	3	2	4	2	2	2	1	3	2	1	1
MCL646	Similar to DPNP_SCHPO 3'(2'),5'-bisphosphate nucleotidase (3'(2'),5-bisphosphonucleoside 3'(2')-phosphohydrolase) (DPNPase) (Halotolerance protein tol1) (Target of lithium protein 1) (O94505) (3e-95)	2	2	3	3	1	1	3	1	3	1	3	1	0	0	1	1	2	4	1	4	1	1	1	0	1	1	1	2	1	1	1	1	1	1	1	1
MCL653	Similar to YNL6_YEAST Hypothetical 57.6 kDa protein in MLS1-RPC19 intergenic region (P53924) (2e-61)	1	1	1	1	1	1	1	1	1	1	1	1	0	0	9	1	1	1	1	2	1	1	1	0	1	1	1	5	2	2	1	2	3	3	1	1
MCL661	Similar to SP10_YEAST SPT10 protein (P35208) (3e-60)	1	2	3	3	2	1	1	1	1	1	1	1	0	0	2	1	1	1	1	4	1	2	1	0	1	2	2	3	1	1	1	1	3	2	1	2
MCL671	Similar to ER26_YEAST 3 beta-hydroxysteroid dehydrogenase/delta 5-->4-isomerase (3Beta-HSD) [Includes: 3-beta-hydroxy-delta(5)-steroid dehydrogenase (3-beta-hydroxy-5-ene steroid dehydrogenase) (Progesterone reductase); Steroid delta-isomerase (Delta-5-3-ketosteroid isomerase)] (P53199) (4e-62)	2	2	1	2	2	3	1	1	2	2	1	3	0	0	2	4	3	1	1	2	1	1	1	0	1	1	1	2	1	1	1	1	2	1	1	1
MCL677	Similar to BDF1_YEAST BDF1 protein (P35817) (6e-58)	1	1	1	1	1	1	1	1	1	1	1	2	0	0	6	1	1	1	1	2	1	1	1	1	1	1	1	4	1	2	1	2	4	4	1	1
MCL727	Similar to YNY8_SCHPO Hypothetical protein C1711.08 in chromosome II (Q9P782) (8e-78)	1	1	1	1	1	1	1	1	1	1	1	1	0	0	1	1	1	1	1	3	2	1	2	0	2	2	2	4	2	2	2	1	4	2	1	1
MCL787	Similar to YDWD_SCHPO Hypothetical protein C23C11.13c in chromosome I (O13917) (7e-64)	1	1	1	1	1	1	1	1	1	1	1	1	0	0	1	1	1	1	1	2	2	1	1	0	1	2	2	4	2	2	2	2	4	2	1	1
MCL816	Similar to CP51_UNCNE Cytochrome P450 51 (CYPLI) (P450-LIA1) (Sterol 14-alpha demethylase) (Eburicol 14-alpha-demethylase) (P450-14DM) (O14442) (0)	2	2	2	3	3	1	1	2	3	2	1	1	0	0	2	1	1	1	1	2	1	1	1	0	1	1	1	2	1	1	1	1	1	1	1	1
MCL818	Similar to ERG7_PNECA Lanosterol synthase (Oxidosqualene--lanosterol cyclase) (2,3-epoxysqualene--lanosterol cyclase) (OSC) (Q96WJ0) (0)	3	2	3	3	2	1	2	2	1	1	1	1	0	0	1	1	1	1	1	2	1	1	1	0	1	1	1	3	1	1	1	1	1	1	2	1
MCL844	Similar to CPGL_SCHPO Glutamate carboxypeptidase-like protein (Q9P6I2) (1e-175)	2	1	1	1	2	2	1	1	1	1	1	2	0	0	2	2	1	1	2	4	1	1	1	0	1	1	1	2	1	1	1	1	2	1	1	2
MCL846	Similar to SNX41_NEUCR Sorting nexin-41 (Q7SB54) (0)	1	1	1	1	1	2	1	1	1	1	1	1	0	0	3	1	1	1	1	4	1	2	2	0	1	1	1	4	1	1	1	1	2	1	2	1
MCL865	Similar to C560_CAEBR Succinate dehydrogenase cytochrome b560 subunit, mitochondrial precursor (P41955) (1e-23)	1	1	1	1	2	1	1	2	2	1	1	1	0	0	1	1	1	1	1	2	1	1	1	0	1	1	1	4	1	2	1	2	4	2	1	1
MCL872	Similar to ERG5_YEAST Cytochrome P450 61 (C-22 sterol desaturase) (P54781) (1e-162)	1	1	2	2	3	1	2	1	2	1	1	1	0	0	3	1	1	2	1	2	1	1	1	0	1	1	1	2	1	1	1	1	2	1	1	1
MCL880	Similar to OBPA_CANAL Oxysterol binding protein-like protein OBPa (Q9UW25) (1e-115)	1	1	1	1	1	1	1	1	1	1	1	1	0	0	3	1	1	1	1	3	1	1	1	0	1	1	1	4	2	2	1	1	3	2	1	1
MCL883	Similar to YFZ2_SCHPO Protein C1039.02 precursor (Q9US39) (1e-115)	2	1	2	1	2	1	1	2	1	1	1	1	0	0	1	1	2	2	2	2	1	1	1	0	1	1	1	2	1	1	1	1	2	1	3	1
MCL897	Similar to BUB1_SCHPO Checkpoint serine/threonine-protein kinase bub1 (O94751) (1e-106)	1	1	1	1	1	1	1	1	1	1	1	3	0	0	1	1	1	1	1	2	2	1	1	0	1	1	1	4	1	2	1	2	2	2	1	2
MCL921	Similar to YNB0_YEAST HYPOTHETICAL 27.5 KD PROTEIN IN SPO1-SIS1 INTERGENIC REGION (P53981) (3e-66)	3	1	2	3	1	1	1	1	2	1	1	1	0	0	2	2	1	1	1	2	1	1	1	0	1	1	1	2	1	1	1	1	2	1	1	1
MCL942	Similar to ENT1_YEAST Epsin-1 (Q12518) (6e-60)	1	1	1	1	1	1	1	1	1	1	1	2	0	0	1	1	1	1	1	2	1	1	1	0	1	1	1	4	1	2	1	2	3	3	1	1
MCL955	Similar to YM40_YEAST Hypothetical 62.5 kDa protein in ALD2-DDR48 intergenic region (Q03212) (7e-54)	1	1	1	1	1	1	1	1	1	1	1	1	0	0	6	1	1	1	1	3	1	2	2	0	1	1	1	2	1	1	1	1	1	1	1	1
MCL978	Similar to YMR7_YEAST Hypothetical 54.1 kDa protein in PEX12-TAP42 intergenic region (Q04371) (4e-93)	2	1	2	1	1	1	2	1	1	1	2	2	0	0	1	1	2	1	2	2	1	1	1	0	1	1	1	2	1	1	1	1	1	1	2	1
MCL993	Similar to YHZ4_YEAST Hypothetical 66.7 kDa protein in EGD2-SUN1 intergenic region (P38880) (1e-131)	1	1	1	1	1	1	1	1	1	1	1	1	0	0	2	1	1	1	1	3	1	2	2	0	2	2	1	2	1	1	2	1	2	1	1	1
MCL1111	Similar to FOLD_YEAST Folylpolyglutamate synthase (Folylpoly-gamma-glutamate synthetase) (FPGS) (Q12676) (9e-64)	1	1	1	1	1	1	1	1	1	1	1	1	0	0	1	1	1	1	1	1	1	1	1	0	1	1	1	4	1	2	1	1	4	2	1	1
MCL1137	Similar to GNTK_SCHPO Probable gluconokinase (Gluconate kinase) (Q10242) (5e-40)	2	1	1	1	1	1	1	1	2	1	2	1	0	0	1	1	1	2	1	2	1	1	1	0	1	1	1	2	1	1	1	1	2	1	1	1
MCL1180	Similar to IME2_YEAST Meiosis induction protein kinase IME2/SME1 (P32581) (3e-71)	1	1	1	1	1	1	1	1	1	2	1	1	0	0	2	1	2	1	1	2	1	1	1	0	1	1	1	2	1	1	1	1	2	1	2	1
MCL1221	Similar to SVF1_NEUCR Survival factor 1 (Q7RX39) (1e-160)	1	1	1	1	1	2	1	1	1	1	1	1	0	0	2	2	1	1	1	2	1	1	1	0	1	1	1	3	1	1	1	1	2	1	1	1
MCL1232	Similar to OM40_NEUCR Mitochondrial import receptor subunit tom-40 (MOM38 protein) (Translocase of outer membrane 40 kDa subunit) (P24391) (0)	1	1	1	1	1	1	1	1	1	1	1	1	0	0	2	1	1	1	1	2	1	2	1	0	1	1	1	2	1	1	1	1	2	1	3	1
MCL1236	Similar to UBP8_SCHPO Probable ubiquitin carboxyl-terminal hydrolase 8 (Ubiquitin thiolesterase 8) (Ubiquitin-specific processing protease 8) (Deubiquitinating enzyme 8) (Q09738) (1e-67)	1	1	1	1	1	1	1	1	1	1	1	3	0	0	1	1	1	1	1	2	1	1	1	0	1	1	1	3	1	1	1	1	2	1	2	1
MCL1263	Similar to YOT7_CAEEL Hypothetical protein ZK632.7 in chromosome III (P34653) (3e-69)	1	2	1	1	1	1	1	1	1	1	1	1	0	0	2	1	1	1	1	2	1	1	1	0	1	1	1	2	1	1	1	1	1	2	2	1
MCL1341	Similar to SYYC_YEAST Tyrosyl-tRNA synthetase, cytoplasmic (Tyrosyl--tRNA ligase) (TyrRS) (P36421) (1e-114)	1	1	1	1	1	1	1	1	2	1	1	1	0	0	1	2	1	1	1	2	1	1	1	1	1	1	1	2	1	1	1	1	2	1	1	1
MCL1415	Similar to SEY1_MAGGR Protein SEY1 (Q525S7) (0)	1	1	1	1	1	1	1	1	1	1	1	1	0	0	2	1	1	1	1	2	1	1	1	0	1	1	1	3	1	1	1	1	2	1	1	1
MCL1417	Pfam motifs: Smr domain (PF01713)	1	1	1	1	1	1	1	1	1	1	1	1	0	0	2	1	1	1	1	2	2	1	1	0	1	1	1	2	1	1	1	1	2	1	1	1
MCL1472	Similar to RGA7_SCHPO Probable Rho-GTPase-activating protein 7 (O94466) (1e-69)	1	1	1	1	1	1	1	1	1	1	1	1	0	0	3	1	1	1	1	2	1	1	1	0	1	1	1	2	1	1	1	1	2	1	1	1
MCL1504	Similar to MPR1_SCHPO Multistep phosphorelay regulator 1 (O94321) (5e-24)	1	1	1	1	1	1	1	1	1	1	1	1	0	0	2	1	1	1	1	2	1	1	1	0	1	1	1	2	2	1	1	1	2	1	1	1
MCL1563	Similar to OM20_NEUCR Mitochondrial import receptor subunit tom-20 (Mitochondrial 20 kDa outer membrane protein) (Translocase of outer membrane 20 kDa subunit) (MOM19 protein) (P35848) (1e-76)	1	1	1	1	1	1	1	1	1	1	1	1	0	0	3	1	1	1	1	2	1	1	1	0	1	1	1	2	2	1	1	1	1	1	1	1
MCL1567	Similar to NCS1_SCHPO Neuronal calcium sensor 1 (NCS-1) (Q09711) (1e-85)	1	1	1	1	1	1	1	1	1	1	1	1	0	0	2	1	1	1	1	2	1	1	1	1	1	1	1	2	1	1	1	1	2	1	1	1
MCL1588	Similar to NPL4_YEAST NPL4 PROTEIN (P33755) (1e-141)	1	1	1	1	1	1	1	1	1	1	1	1	0	0	1	1	1	1	1	2	1	1	1	1	1	1	1	2	1	1	1	1	2	1	1	1
MCL1604	Similar to SYMC_SCHPO Probable methionyl-tRNA synthetase, cytoplasmic (Methionine--tRNA ligase) (MetRS) (Q9UUF2) (0)	1	1	1	1	1	1	2	1	1	1	1	1	0	0	1	1	1	1	1	2	1	1	1	1	1	1	1	2	1	1	1	1	1	1	1	1
MCL1607	Similar to YHG4_YEAST Hypothetical 50.6 kDa protein in RPL14B-GPA1 intergenic region (P38757) (9e-51)	1	1	1	1	1	1	1	1	1	1	1	1	0	0	1	1	1	1	1	2	1	1	1	0	1	1	1	2	1	1	1	1	2	2	1	1
MCL1614	Similar to MSP1_SCHPO Msp1 protein, mitochondrial precursor (P87320) (0)	1	1	1	1	1	1	1	1	1	2	1	1	0	0	1	1	1	1	1	2	1	1	1	0	1	1	1	2	1	1	1	1	2	1	1	1
MCL1620	Similar to YEP5_SCHPO Hypothetical WD-repeat protein C23H3.05c in chromosome I (O42858) (6e-88)	1	1	1	1	1	2	1	1	1	1	1	1	0	0	1	1	1	1	1	2	1	1	1	0	1	1	1	2	1	1	1	1	2	1	1	1
MCL1651	Similar to YEN9_YEAST Hypothetical protein YER049W (P40032) (2e-94)	1	1	1	1	1	1	1	1	1	1	1	1	0	0	2	1	1	1	1	2	1	1	1	0	1	1	1	2	1	1	1	1	2	1	1	1
MCL1654	Similar to T2AG_SCHPO Probable transcription initiation factor IIA small chain (O74948) (8e-31)	1	1	1	1	1	1	1	1	1	1	1	1	0	0	2	1	1	1	1	2	1	1	1	0	1	1	1	2	1	1	1	1	2	1	1	1
MCL1667	Similar to YG3L_YEAST HYPOTHETICAL 51.6 KDA PROTEIN IN RPL24B-RSR1 INTERGENIC REGION (P48236) (2e-64)	1	1	1	1	1	1	1	1	1	1	1	1	0	0	2	1	1	1	1	2	1	1	1	0	1	1	1	2	1	1	1	1	2	1	1	1
MCL1675	Similar to DHOM_YEAST Homoserine dehydrogenase (HDH) (P31116) (2e-99)	1	1	1	2	1	1	1	1	1	1	1	1	0	0	2	1	1	1	1	2	1	1	1	0	1	1	1	2	1	1	1	1	1	1	1	1
MCL1676	Pfam motifs: Cytidylyltransferase family (PF01148)	1	1	1	1	1	1	1	1	1	1	1	1	0	0	1	1	1	1	1	2	1	1	2	0	1	1	1	2	1	1	1	1	2	1	1	1
MCL1694	Similar to TFB3_YARLI RNA polymerase II transcription factor B subunit 3 (RNA polymerase II transcription factor B p38 subunit) (RNA polymerase II transcription factor B 38 kDa subunit) (Q6C7D0) (1e-60)	1	1	1	1	1	1	1	1	1	1	1	1	0	0	1	1	1	1	1	2	1	1	1	1	1	1	1	2	1	1	1	1	2	1	1	1
MCL1697	Similar to YN19_YEAST Hypothetical 73.4 kDa protein in ERG24-MET2 intragenic region (P53835) (3e-56)	1	1	1	1	1	1	1	1	1	2	1	1	0	0	1	1	1	1	1	2	1	1	1	0	1	1	1	2	1	1	1	1	2	1	1	1
MCL1704	Similar to IM22_YEAST Mitochondrial import inner membrane translocase subunit TIM22 (Q12328) (6e-25)	1	1	1	1	1	1	1	1	1	1	1	1	0	0	1	1	1	1	1	3	1	1	1	0	1	1	1	2	2	1	1	1	1	1	1	1
MCL1714	Similar to RT05_YEAST Probable mitochondrial 40S ribosomal protein S5 (P33759) (9e-39)	1	1	1	1	1	1	1	1	1	1	1	1	0	0	2	1	1	1	1	2	1	1	1	0	1	1	1	2	1	1	1	1	2	1	1	1
MCL1724	Similar to SERC_YEAST Phosphoserine aminotransferase (PSAT) (P33330) (3e-83)	1	1	1	1	1	1	1	1	1	1	1	1	0	0	1	1	1	1	1	2	1	1	2	0	1	1	1	2	1	1	1	1	2	1	1	1
MCL1729	Similar to YFE6_YEAST Hypothetical 24.0 kDa protein in EMP47-SEC53 intergenic region (P43557) (3e-33)	1	1	1	1	1	1	1	1	1	1	1	1	0	0	2	1	1	1	1	2	1	1	1	0	1	1	1	2	1	1	1	1	1	1	2	1
MCL1732	Similar to YAC2_SCHPO Hypothetical protein C16C9.02c in chromosome I (Q09816) (5e-80)	1	1	1	1	1	1	1	1	1	1	1	2	0	0	1	1	1	1	1	2	1	1	1	0	1	1	1	2	1	1	1	1	2	1	1	1
MCL1739	Similar to NPT1_YEAST Nicotinate phosphoribosyltransferase (NAPRTase) (P39683) (1e-102)	1	1	1	1	1	1	1	1	1	1	1	1	0	0	2	1	1	1	1	1	1	1	1	0	1	1	1	2	2	1	1	1	2	1	1	1
MCL1747	Similar to DENR_SCHPO Density-regulated protein homolog (O42929) (4e-41)	1	1	1	1	1	1	1	1	1	1	1	1	0	0	2	1	1	1	1	2	1	1	1	0	1	1	1	2	1	1	1	1	2	1	1	1
MCL1756	Similar to CC16_SCHPO Cell division control protein 16 (P36618) (2e-63)	1	1	1	1	1	1	1	1	1	1	1	1	0	0	1	1	1	1	1	2	1	1	1	0	1	1	1	2	1	1	1	1	2	1	1	1
MCL1763	Similar to PEM2_YEAST Methylene-fatty-acyl-phospholipid synthase (Unsaturated phospholipid methyltransferase) (P05375) (2e-55)	1	1	1	1	1	1	1	1	1	1	1	1	0	0	1	1	1	2	1	1	1	1	1	0	1	1	1	2	1	1	1	1	2	1	1	1
MCL1776	Similar to RT02_YEAST Mitochondrial 40S ribosomal protein MRP2 (P10663) (5e-25)	1	1	1	1	1	1	1	1	1	1	1	1	0	0	1	1	1	1	1	2	1	1	1	0	1	1	1	2	1	1	1	1	2	1	1	1
MCL1783	Similar to YHA2_YEAST Hypothetical 51.2 kDa protein in LAG1-RPL14B intergenic region (P38753) (7e-63)	1	1	1	1	1	1	1	1	1	1	1	1	0	0	1	1	1	1	1	2	1	1	1	0	1	1	1	2	1	1	1	1	2	1	1	1
MCL1802	Similar to IM23_SCHPO Probable mitochondrial import inner membrane translocase subunit TIM23 (Q9USM7) (3e-52)	1	1	1	1	1	1	1	1	1	1	1	1	0	0	1	1	1	1	1	2	1	1	1	0	1	1	1	2	1	1	1	1	2	1	1	1
MCL1840	Similar to RML2_YEAST 60S ribosomal protein RML2, mitochondrial precursor (P32611) (2e-84)	1	1	1	1	1	1	1	1	1	1	1	1	0	0	1	1	1	1	1	2	1	1	1	0	1	1	1	2	1	1	1	1	2	1	1	1
MCL1847	Similar to CUT9_SCHPO Protein cut9 (P41889) (1e-131)	1	1	1	1	1	1	1	1	1	1	1	1	0	0	1	1	1	1	1	2	1	1	1	0	1	1	1	2	1	1	1	1	1	2	1	1
MCL1849	Similar to YBZ1_YEAST HYPOTHETICAL 38.5 KD PROTEIN IN IRA1-MAK5 INTERGENIC REGION (P38278) (7e-38)	1	1	1	1	1	1	1	1	1	1	1	1	0	0	1	1	1	1	1	2	1	1	1	0	1	1	1	2	1	1	1	1	2	1	1	1
MCL1856	Similar to SPT8_YEAST Transcription factor SPT8 (P38915) (9e-82)	1	1	1	1	1	1	1	1	1	1	1	1	0	0	1	1	1	1	1	2	1	1	1	0	1	1	1	2	1	1	1	1	2	1	1	1
MCL1867	Similar to YKE1_YEAST Hypothetical 26.2 kDa protein in SPC42-PTM1 intergenic region (P36095) (4e-28)	1	1	1	1	1	1	1	1	1	1	1	1	0	0	1	1	1	1	1	2	1	1	1	0	1	1	1	2	1	1	1	1	2	1	1	1
MCL1868	Similar to WOS2_SCHPO Wos2 protein (p21) (Q11118) (8e-30)	1	1	1	1	1	1	1	1	1	1	1	1	0	0	1	1	1	1	1	2	1	1	1	0	1	1	1	2	1	1	1	1	2	1	1	1
MCL1870	Similar to CHS5_SCHPO Probable chitin biosynthesis protein C6G9.12 (CHS5 homolog) (Q92357) (2e-66)	1	1	1	1	1	1	1	1	1	1	1	1	0	0	1	1	1	1	1	2	1	1	1	0	1	1	1	2	1	1	1	1	2	1	1	1
MCL1881	Similar to THI4_FUSOX Thiazole biosynthetic enzyme, mitochondrial precursor (Stress-inducible protein sti35) (P23618) (1e-139)	1	1	1	1	1	1	1	1	1	1	1	1	0	0	1	1	1	1	1	2	1	1	1	0	1	1	1	2	1	1	1	1	1	2	1	1
MCL1883	Similar to YABF_SCHPO Hypothetical protein C2G11.15c in chromosome I (Q09814) (9e-37)	1	1	1	1	1	1	1	1	1	1	1	1	0	0	1	1	1	1	1	2	1	1	1	0	1	1	1	2	1	1	1	1	1	1	2	1
MCL1888	Similar to YCV1_YEAST Hypothetical protein YCR061W precursor (P25639) (2e-62)	1	1	1	1	1	1	1	1	1	1	1	1	0	0	1	1	1	1	1	2	1	1	1	0	1	1	1	2	1	1	1	1	2	1	1	1
MCL1966	Similar to YOJ8_YEAST Hypothetical 118.4 kDa protein in WRS1-PKH2 intergenic region (Q12496) (1e-144)	1	1	1	1	1	1	1	1	1	1	1	1	0	0	1	1	1	1	1	2	1	1	1	0	1	1	1	2	1	1	1	1	1	1	1	1
MCL1993	Similar to YN8K_YEAST Putative mitochondrial 40S ribosomal protein YNR036C (P53732) (3e-40)	1	1	1	1	1	1	1	1	1	1	1	1	0	0	1	1	1	1	1	2	1	1	1	0	1	1	1	2	1	1	1	1	1	1	1	1
MCL2019	Similar to CNS1_YEAST Cyclophilin seven suppressor 1 (STI1 stress-inducible protein homolog) (P33313) (1e-52)	1	1	1	1	1	1	1	1	1	1	1	1	0	0	1	1	1	1	1	2	1	1	1	0	1	1	1	2	1	1	1	1	1	1	1	1
MCL2028	Similar to T2FB_YEAST Transcription initiation factor IIF, beta subunit (TFIIF-beta) (TFIIF medium subunit) (Transcription factor G 54 kDa subunit) (P41896) (3e-29)	1	1	1	1	1	1	1	1	1	1	1	1	0	0	1	1	1	1	1	2	1	1	1	0	1	1	1	2	1	1	1	1	1	1	1	1
MCL2114	Similar to YAR1_YEAST Ankyrin repeat-containing protein YAR1 (P46683) (4e-21)	1	1	1	1	1	1	1	1	1	1	1	1	0	0	1	1	1	1	1	1	1	1	1	0	1	1	1	2	1	1	1	1	1	1	1	1
